# Supplementary material for: Meningioma growth dynamics assessed by radiocarbon retrospective birth dating
Source: PubMed Central journal article supplement — eBioMedicine. 2017 Dec 19;27:176–81. doi: 10.1016/j.ebiom.2017.12.020 (PMC5828546; doi:10.1016/j.ebiom.2017.12.020), 2017-12-19
Supplement: mmc1.pdf [file mmc1.pdf]

## Supplemental Material

Huttner, HB, et al.

### Meningioma growth dynamics assessed by radiocarbon retrospective birth dating

#### Content

##### Supplementary methods.

**Supplementary Table 1.** Patient demographics, clinical and radiological characteristics as well as neuropathological findings of all patients with meningiomas.

**Supplementary figure 1:**  $^{14}\text{C}$  concentrations of meningioma in comparison to no-turnover control samples.

**Supplementary figure 2:** Growth curves of meningiomas

**Supplementary figure 3:** Correlations with age of meningiomas.

## Supplementary methods.

### The age-structured Gompertz model

The mathematical model consists of a linear partial differential equation with an age-structure:

$$\begin{aligned}\frac{\partial n(x,t)}{\partial t} + \frac{\partial n(x,t)}{\partial x} &= 0, \\ n(x,0) &= N_0 \delta(x), \\ n(0,t) &= \alpha N(t) \ln\left(\frac{K}{N(t)}\right).\end{aligned}$$

Here,  $n(x,t)$  is the density of cells of age  $x$  at time  $t$ ,  $N_0$  is the initial number of cells and the Dirac delta function  $\delta(x)$  ensures that all cells initially have an age  $x=0$ . The boundary condition  $n(0,t)$  describes the addition of new cells in time following a Gompertz type of growth.  $N(t)$  is the total number of cells and can be calculated by summing all cells of all ages,  $N(t) = \int_0^t n(x,t) dx$ . The average age of cells can be calculated using the following formula:

$$\langle a \rangle = \frac{\int_0^t xn(x,t) dx}{N(t)}.$$

The solution of the age-structured Gompertz equation can be given explicitly by:

$$n(x,t) = \begin{cases} N_0 \delta(x-t) + \alpha K \ln\left(\frac{K}{N_0}\right) e^{-\alpha(t-x)} e^{\ln\left(\frac{N_0}{K}\right) e^{-\alpha(t-x)}}, & t \geq x \\ 0, & x > t \end{cases}$$

In this model, we made several assumptions regarding the cell dynamics during aging. First, we assumed that there is no cell death (0 on the right hand side of the first equation of the model). Second, we assumed that a cell is born at age zero (boundary condition at  $x=0$ ). Third, we assumed that mother cells retain their age when they divide.

### Patients 1-5:

To estimate the age of the tumor, we relied on two main experimental data for each patient: the average age of cells and the tumor size measured at two different time points of its evolution (table 1). The method consists of finding the appropriate values of the coefficients  $(t, \alpha, K)$  such that the quantities calculated using the model fit with their corresponding experimental data. For that, we defined the following cost function:

$$J_1 = |\tilde{V}_1 - V_{d1}|^2 + |\tilde{V}_2 - V_{d2}|^2 + |\langle \tilde{a} \rangle - \langle a_d \rangle|^2,$$

where the model predicted values  $\tilde{V}_1$ ,  $\tilde{V}_2$  and  $\langle \tilde{a} \rangle$  are the tumor volume at the time of the first MRI scan, the tumor volume at the time of the second MRI scan, and the average age, respectively.  $V_{d1}$ ,  $V_{d2}$  and  $a_d$  are the corresponding experimental data. To find the age of the tumor, the problem reduces to a minimization problem. Find:

$$\min_{(t, \alpha, K)} J_1(t, \alpha, K; \tilde{V}_1, \tilde{V}_2, \langle \tilde{a} \rangle),$$

such that  $(t, \alpha, K)$  belong to an admissible set of values. This means that the time of growth  $t$  should not exceed the patient age. The time interval between the two MRI scans (times at which  $V_{d1}$  and  $V_{d2}$  are collected) should also be respected. The coefficients  $\alpha$  and  $K$  should be chosen so that the value of the growth rate  $\alpha \ln\left(\frac{K}{N}\right)$  does not exceed the growth rate induced by the Ki-67 index. This is due to the fact that we do only consider net growth. This may not reflect the heterogeneity of the population, because there might be another subset of non-proliferating cells. Therefore, the Ki-67 index, gave us an upper bound for the growth rate. Due to the fact that we had three parameters to estimate and three experimental data points to fit, the solution to the minimization problem was unique. We found a unique tumor age, a proliferation coefficient and a carrying capacity that fit the experimental data. We calculated also the lag time for each growth curve. The lag time is defined to be the period after which a noticeable growth starts to be seen. It can be calculated by taking the intersection of the tangent line at the inflexion point of the growth curve and the horizontal line  $y = N_0$  [1]. Results are given in table 2.

### **Patients 6-14:**

For each patient the average age of cells and only one measurement for the tumor volume, which was calculated during the tumor extraction surgery (table 3), was available. Having two data points and three parameters to estimate for each patient led to non uniqueness problems in the estimation procedure. To circumvent this difficulty, we looked for additional data about meningioma growth rate in the literature. We used results taken from the work of Nakamura and colleagues. In this study authors investigated the relation between the patient age and the growth rate of meningioma [2].

Following the approach used for the first set of patients, we estimated the age of the tumor relying on three main experimental data for each patient: the average age of cells, the tumor size and the absolute growth rate calculated from Nakamura data. The new cost function reads:

$$J_2 = |\tilde{V} - V_d|^2 + |\langle \tilde{a} \rangle - \langle a_d \rangle|^2 + |\tilde{\gamma} - \gamma_d|^2,$$

where the model predicted values  $\tilde{V}$ ,  $\langle \tilde{a} \rangle$  and  $\tilde{\gamma}$  are the volume, the average age of cells and the absolute growth rate, respectively.  $V_d$ ,  $a_d$  and  $\gamma_d$  are the corresponding experimental data. Similarly, by minimizing the cost function  $J_2$ , we were able to estimate the tumor age for each patient. Results are given in table 4.

### **Tables:**

**Table 1: Experimental data for the first 5 patients.**

| Patient | Birthday | Date of operation | Ki-67 index | Tumor size at surgery | Tumor size beforehand | Months between MRI scans | Average age of cells |
|---------|----------|-------------------|-------------|-----------------------|-----------------------|--------------------------|----------------------|
|         |          |                   |             |                       |                       |                          |                      |

|   |           |           |       |       |       |    |      |
|---|-----------|-----------|-------|-------|-------|----|------|
| 1 | Apr. 1938 | Oct. 2013 | 2,41  | 62,22 | 5,32  | 85 | 4.20 |
| 2 | Oct. 1935 | May. 2014 | 1,79  | 96,59 | 56,16 | 33 | 4.10 |
| 3 | Sep. 1955 | Feb. 2009 | 1,49  | 145   | 103   | 60 | 5.70 |
| 4 | Apr. 1952 | Jul. 2003 | 0,61  | 2,51  | 2,26  | 52 | 9.40 |
| 5 | Apr. 1964 | Sep. 2014 | 12,02 | 9,36  | 1,54  | 11 | 0.70 |

**Table 2: Modeling results for the first 5 patients.**

| Patient | Carrying capacity K | Proliferation coefficient $\alpha$ | Estimated tumor age | Lag time |
|---------|---------------------|------------------------------------|---------------------|----------|
| 1       | 72.7689             | 0.3975                             | 12.7632             | 5.5831   |
| 2       | 609.1652            | 0.0939                             | 28.664              | 24.5031  |
| 3       | 146.2822            | 0.7370                             | 10.8267             | 3.0486   |
| 4       | 2.6127              | 0.2966                             | 21.2139             | 7.0012   |
| 5       | 9.5251              | 5.0683                             | 1.4168              | 0.4211   |

**Table 3: Experimental data for the patients 6-14.**

| Patient | Birthday   | Date of operation | Average age of cells (y) | Ki-67 index | Tumor size (cm <sup>3</sup> ) |
|---------|------------|-------------------|--------------------------|-------------|-------------------------------|
| 6       | Aug. 1932  | Apr. 2004         | 3.0                      | 1.0         | 50.5                          |
| 7       | May. 1933  | Jan. 2001         | 3.3                      | 0.9         | 1.7                           |
| 8       | Dec. 1939  | Nov. 2001         | 3.8                      | 0.7         | 44.5                          |
| 9       | Dec. 1948  | Dec. 1996         | 3.7                      | 1.1         | 7.5                           |
| 10      | July. 1953 | Jan. 2003         | 2.2                      | 1.2         | 6.25                          |
| 11      | Sep. 1963  | Jan. 2002         | 2.4                      | 0.6         | 2.25                          |
| 12      | Oct. 1966  | June. 2011        | 6.4                      | 0.8         | 38.5                          |
| 13      | Jan. 1969  | Feb. 2011         | 4.9                      | 1.0         | 21                            |
| 14      | June. 1967 | Mar. 2011         | 0.1                      | 7.1         | 168                           |

**Table 4: Modeling results for the second set of patients.**

| Patient | Proliferation coefficient $\mu$ | Carrying capacity K | Tumor age | Lag time |
|---------|---------------------------------|---------------------|-----------|----------|
| 6       | 0.1598                          | 271.0654            | 18.5091   | 14.2583  |
| 7       | 0.0748                          | 59.1068             | 27.2624   | 29.6740  |
| 8       | 0.1438                          | 187.1468            | 21.7585   | 15.7387  |
| 9       | 0.0943                          | 76.6468             | 26.3990   | 23.5863  |
| 10      | 0.1274                          | 126.0214            | 17.4661   | 17.6163  |
| 11      | 0.0995                          | 82.4942             | 20.2259   | 22.3877  |
| 12      | 0.1132                          | 86.6916             | 31.1183   | 19.6672  |
| 13      | 0.1056                          | 91.3638             | 28.6257   | 21.1330  |
| 14      | 0.6486                          | 4.1422e+08          | 1.5887    | 4.1725   |

**Bibliography**

[1] I. a. M. Swinnen, K. Bernaerts, E. J. J. Dens, A. H. Geeraerd, et J. F. Van Impe, « Predictive modelling of the microbial lag phase: a review », *Int. J. Food Microbiol.*, vol. 94, n° 2, p. 137-159, juill. 2004.

[2] M. Nakamura, F. Roser, J. Michel, C. Jacobs, et M. Samii, « The natural history of incidental meningiomas », *Neurosurgery*, vol. 53, n° 1, p. 62-70-71, juill. 2003.

**Supplementary Table 1. Patient demographics, clinical and radiological characteristics as well as neuropathological findings of all patients with meningiomas.**

| PATIENTS   | PARAMETERS |        | CLINICAL          |             | RADIOLOGICAL           |                                                 |                             | TREATMENT       | HISTOLOGICAL |                |             |               |
|------------|------------|--------|-------------------|-------------|------------------------|-------------------------------------------------|-----------------------------|-----------------|--------------|----------------|-------------|---------------|
|            | Age        | Sex    | De-novo diagnosis | Symptomatic | Tumor Size pre-OP (cc) | Tumor size previous MRI (months before surgery) | Location                    | Date of surgery | WHO grade    | type           | Ki-67 index | cells (1/mm3) |
| Patient 1  | 75         | female | 0                 | 0           | 62.2                   | 5.3 (85 months)                                 | Sphenoidal left             | 10/2013         | 1            | meningothelial | 2.4%        | 7632          |
| Patient 2  | 79         | female | 0                 | 0           | 96.6                   | 56.1 (33 months)                                | Falx parietal left          | 05/2014         | 1            | fibrous        | 1.7%        | 6264          |
| Patient 3  | 54         | male   | 0                 | 0           | 144.0                  | 103 (60 months)                                 | Parasagittal parietal right | 02/2009         | 1            | meningothelial | 1.4%        | 5904          |
| Patient 4  | 51         | male   | 0                 | 0           | 2.6                    | 2.2 (52 months)                                 | Suprasellar right           | 07/2003         | 1            | fibrous        | 0.6%        | 5712          |
| Patient 5  | 50         | female | 0                 | 0           | 9.4                    | 1.5 (11 months)                                 | Sphenoidal right            | 09/2014         | 2            | atypical       | 12.2%       | 3728          |
| Patient 6  | 72         | female | 1                 | 1           | 50.5                   | n.a.                                            | Convexity occipital left    | 10/2004         | 1            | meningothelial | 1.0%        | 4409          |
| Patient 7  | 68         | female | 1                 | 1           | 2.7                    | n.a.                                            | Clinoid left                | 01/2001         | 1            | meningothelial | 0.9%        | 5177          |
| Patient 8  | 62         | female | 1                 | 1           | 44.5                   | n.a.                                            | Falx frontal right          | 03/2001         | 1            | fibrous        | 0.7%        | 5692          |
| Patient 9  | 48         | female | 1                 | 1           | 7.5                    | n.a.                                            | Temporal left               | 12/1996         | 1            | fibrous        | 1.1%        | 6101          |
| Patient 10 | 50         | female | 1                 | 1           | 6.3                    | n.a.                                            | Convexity parietal left     | 09/2003         | 1            | meningothelial | 1.2%        | 5594          |
| Patient 11 | 39         | female | 1                 | 1           | 2.6                    | n.a.                                            | frontobasal                 | 09/2002         | 1            | meningothelial | 0.6%        | 5841          |
| Patient 12 | 45         | female | 1                 | 1           | 38.5                   | n.a.                                            | Convexity frontal right     | 02/2011         | 1            | fibrous        | 0.8%        | 6015          |
| Patient 13 | 42         | female | 1                 | 1           | 21.0                   | n.a.                                            | Cerebellar left             | 04/2011         | 1            | fibrous        | 1.0%        | 6223          |
| Patient 14 | 44         | male   | 1                 | 1           | 168.0                  | n.a.                                            | Parasagittal frontal left   | 07/2011         | 2            | atypical       | 7.1%        | 4912          |



**Supplementary Figure 1:  $^{14}\text{C}$  concentrations of meningioma in comparison to no-turnover control samples.**

Genomic  $^{14}\text{C}$  concentrations of cortical and cerebellar neurons are not different from atmospheric  $^{14}\text{C}$  values at birth (plotted at the time of birth, black triangle), demonstrating no postnatal cellular turnover of these populations (Bergmann et al., 2012; Huttner et al., 2014). Genomic  $^{14}\text{C}$  concentrations from WHO grade I (blue dots) and WHO grade II (red dots) meningioma show substantial deviation from the atmospheric  $^{14}\text{C}$  curve indicating the generation of new cells during the course of life (tumor growth). All data points are plotted at the birth of the patient. The black curve indicates atmospheric  $^{14}\text{C}$  concentrations measured over the last decades in the northern hemisphere.

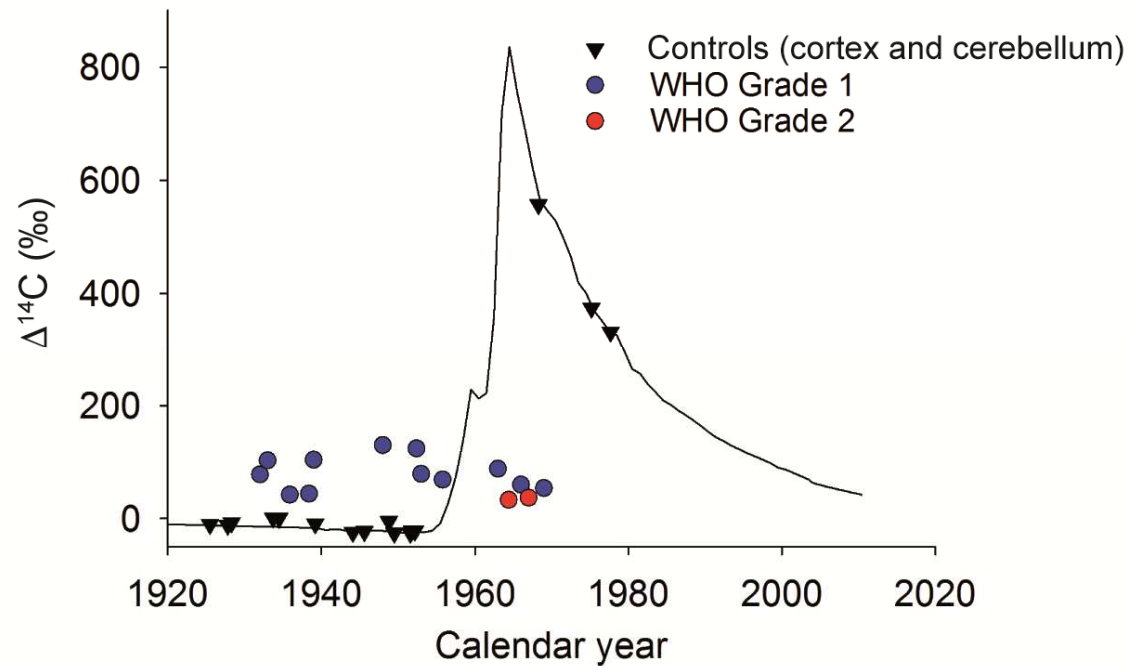

## Supplementary Figure 2: Growth curves of meningiomas

Model-fitted meningioma growth curves given for patient 6 to 13 with benign fibrous (dark blue), meningothelial (light blue), and atypical (red) meningiomas.

The growth curves were estimated using nonlinear least-square with uniform weighting. Parameters were based on  $^{14}\text{C}$  measurements, histological data and on volumetric measurement of one MRI obtained prior to surgery (see Methods).

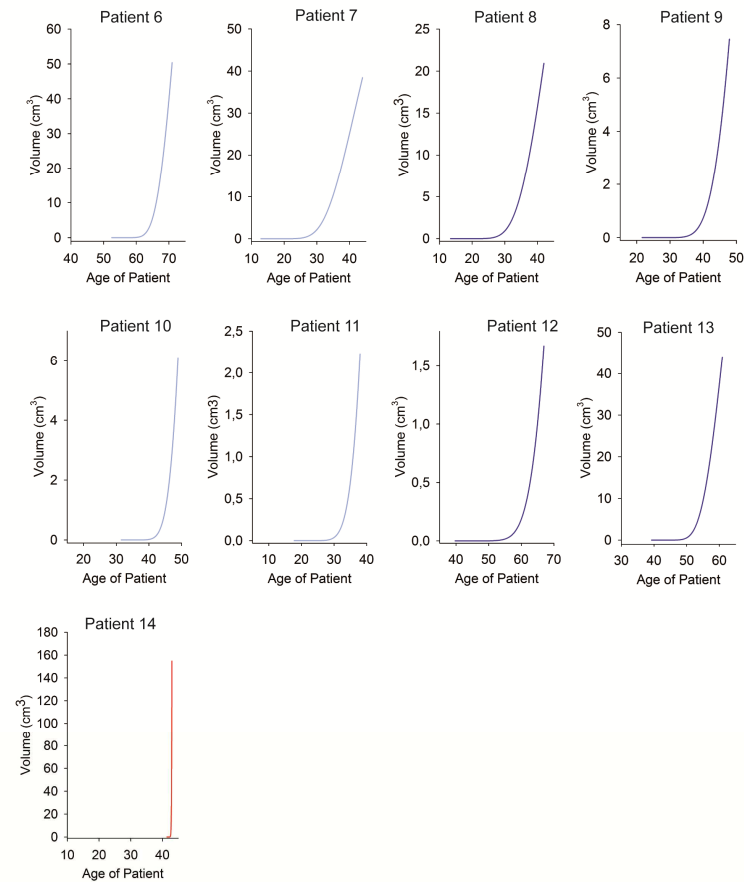

**Supplementary Figure 3: Correlations with age of meningiomas.**

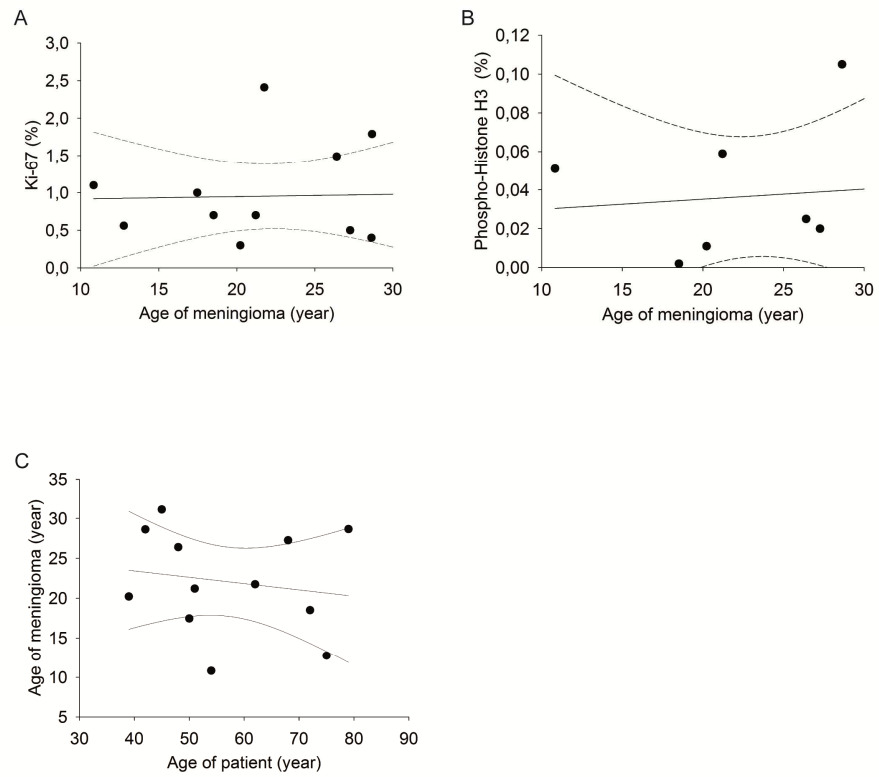

No significant correlations of age of meningiomas with (A) Ki-67 labeling index, phospho-Histone H3 (B) or with (C) age of patient.
